# Supplementary material
Source: PubMed Central journal article supplement (PMC4826015)
Supplement: supp_tpc.15.01027_TPC2015-01027-RAR1_Supplemental_Data.pdf [file supp_tpc.15.01027_TPC2015-01027-RAR1_Supplemental_Data.pdf]

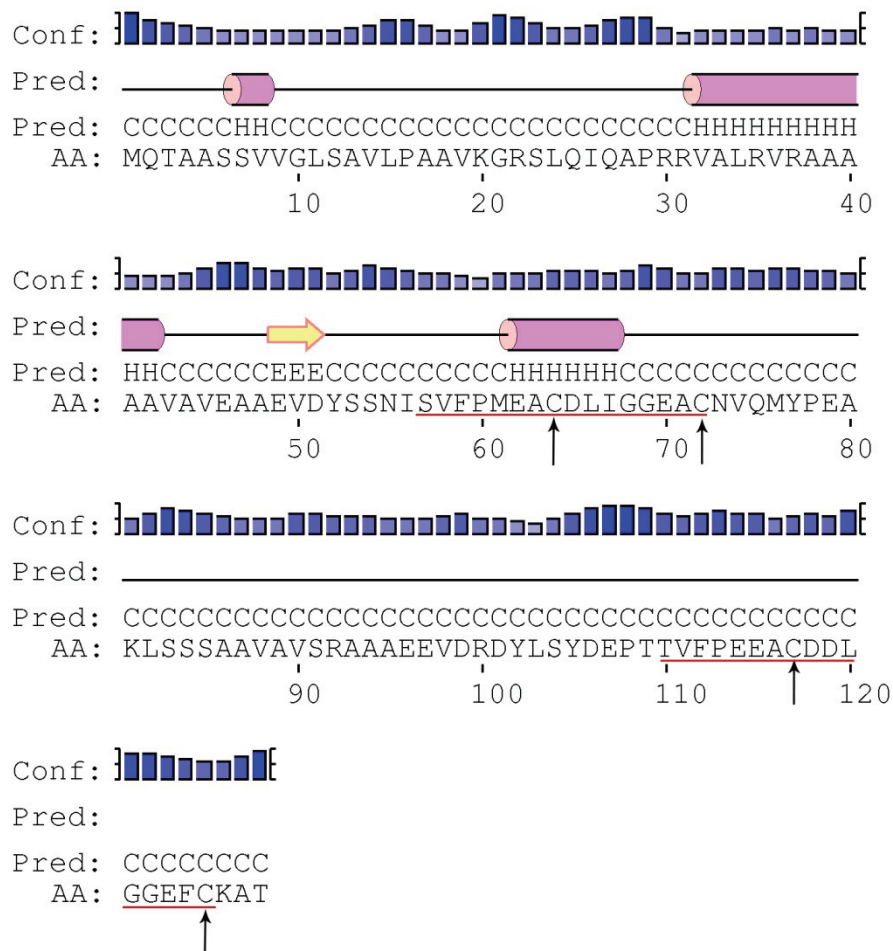

**Supplemental Figure 1.** Amino Acid Sequence and Structural Predictions of Rice LIR1. The conserved LIR1 motifs are underlined (red) and the conserved Cys residues are indicated by black arrows. The secondary structure prediction was performed by PSIPRED (<http://bioinf.cs.ucl.ac.uk/psipred>). H stands for helix, C for coil, and E for strand. The height of the blue bars for each amino acid represents the level of confidence of each prediction.

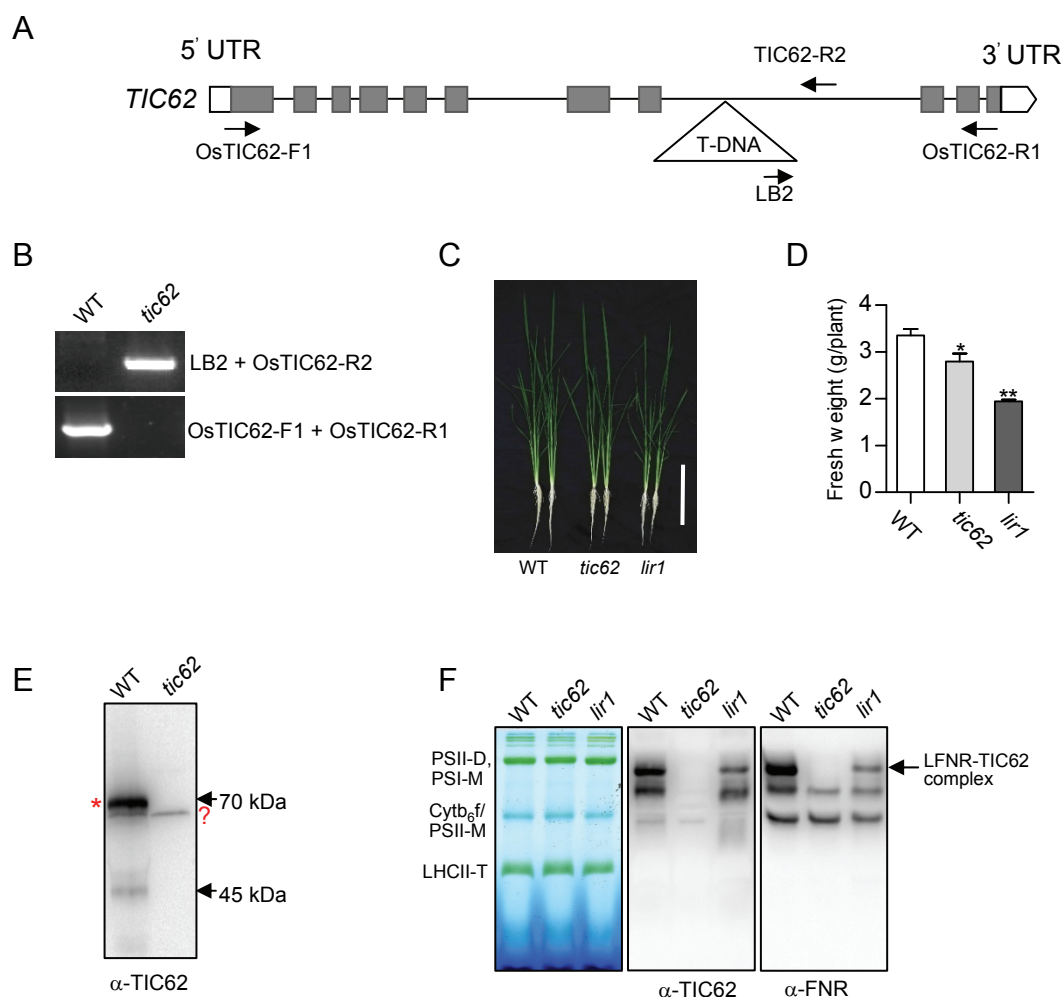

**Supplemental Figure 2. Characteristics of Rice *tic62* Plants.**

**(A)** Genomic structure of *TIC62*. Gray boxes denote exons, black lines introns, and white boxes 5'- and 3'-untranslated regions. The T-DNA insertion site is indicated by a triangle. Binding sites of *TIC62* gene-specific primers (OsTIC62-F1, OsTIC62-R1, OsTIC62-R2) and T-DNA-specific left border primer (LB2) used for screening of *tic62* homozygous plants are depicted.

**(B)** PCR analysis of WT and *tic62* using genomic DNA (upper panel) and cDNA (lower panel) as PCR templates, respectively, with the primers indicated in (A).

**(C)** Phenotypes of WT, *tic62*, and *lir1* plants grown in hydroponic culture for 35 d. Bar = 10 cm.

**(D)** Fresh weights of 35 d-old WT, *tic62*, and *lir1* plants grown in hydroponic culture.

**(E)** Immunoblot of SDS-PAGE of WT and *tic62* total leaf extracts; 10  $\mu$ g protein was loaded onto the gel and immunodetected with anti-TIC62 antibody. The 70 kDa major TIC62 band is indicated by a red star and the putative TROL band by a question mark.

**(F)** BN PAGE analysis of WT, *tic62*, and *lir1* plants after 4 h in the dark. The left panel shows the thylakoid protein complexes, and the middle and right panels show immunoblots using anti-TIC62 and LFNR antisera, respectively; 5  $\mu$ g chlorophyll was loaded onto the gel. PSII-D/M, PSII dimers/monomers; PSI-M, PSI monomers; LHCII-T, LHCII trimers.

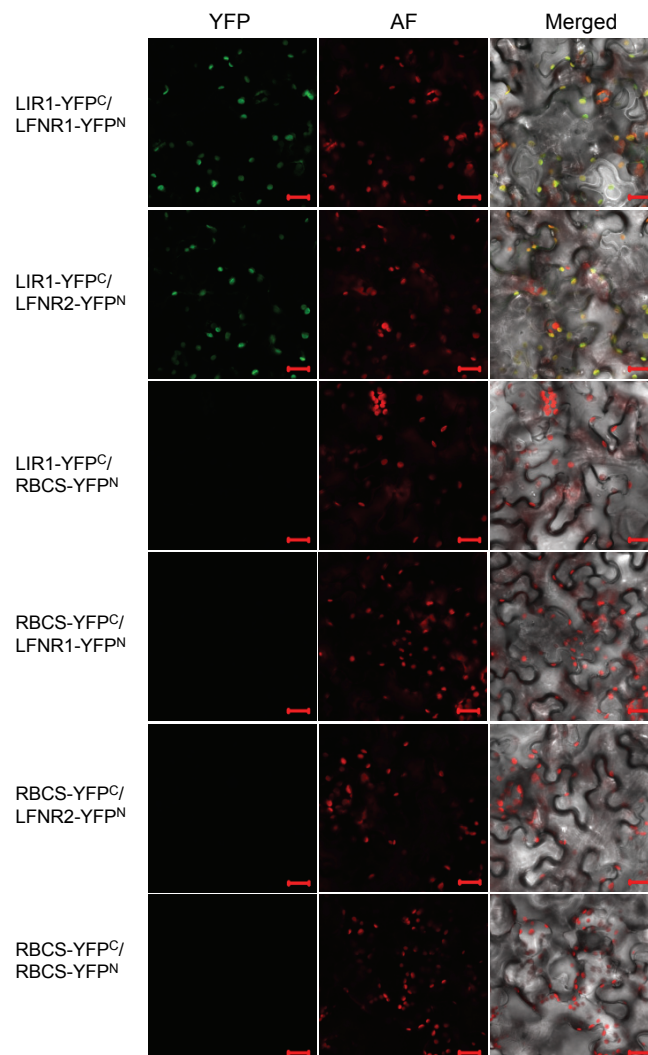

**Supplemental Figure 3.** Bimolecular Fluorescence Complementation (BiFC) Analysis of Protein Interactions in *Nicotiana tabacum*.

Bimolecular fluorescence complementation (BiFC) analysis for interaction between rice LIR1 and LFNRs. C- and N-terminal fragments of yellow fluorescence protein (YFP<sup>C</sup> and YFP<sup>N</sup>) were fused to LIR1 and LFNR1 or LFNR2, respectively. Combinations of plasmids (indicated on the left panel) were transiently transformed into leaves of *Nicotiana tabacum*. RBCS (ribulose biphosphate carboxylase small chain, LOC\_Os12g19470) serves as a chloroplast localized negative control. Presence of YFP signal (green) indicates reconstitution of YFP through protein interaction of the tested pairs. Positions of the chloroplasts are indicated by red auto-fluorescence (red). The scale bar represents 20  $\mu$ m.

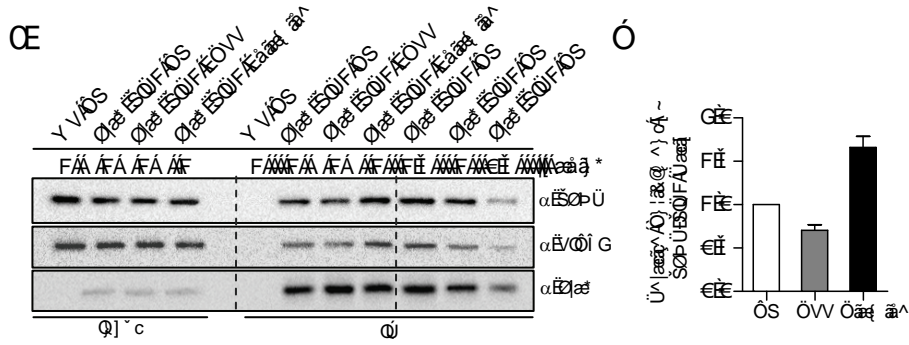

**Supplemental Figure 4.** Ö-^&cf -ÖVW/æ äÄÖææ æ^Ä } Ä@Ä c:æc } ÖVc ^ } Üæ^SÜFÄ æ äÄSÜE  
**(A)** Ö[ ä { } ] ] ^&æ æææ } Äæ • æ Äc ^ } Äæ ESÜFESÜPÜÄ äÄÜI GÄ IÖSÄÜÄ ~ ^Äæ Ä & } d [ | @ & Ä PÄ È ÖVWÄÜÄ ~ ^ÄÄ ] ] ^ } c } äÖCÄ T ÖVVDæ äÄææ æ^ÄÜÄ ~ ^Ä • ] ] ^ } c } äÖÄ T Äææ æ^ÄÄ ~ ^Ä • ÄV [ cÄ ] | cÄ • Äcdæc äÄÄ [ { ÄcÄÈ ] äÄ VÄ IÄ 35S:Flag-LIR1 | æ^Ä^ä ] • Ä ^ÄÄ & äæ äÄ äÖæ cÄ } Ä GÄ æ } ^cÄ^ææ ÄV@Ä ä { ~ ] ] ^&æ æææ } ÄÜDæ äÄ cÄcdæc ÄQ ] ~ dÄ ^ÄÄ ~ äb&c äÄ Ä { } [ ä ] | cÄ æ • ä Ä äÖ Qæ ESÜPÜÄ äÄÜI GÄæ cÄ ää • ÄQ ] | ÄæQ ] | ÄÄÄ Ä Ä Ä cÄ ] | cÄ Äcdæc ÄFÄÜSÄ [ { Ä CÄ SÄ cÄ ] | cÄ Äcdæc Ää ÈÄ Ä | cÄÄ ] | cÄ • ÄFÄÜSÄ [ { ÄFÄÜSÄ | cÄÄ ] | cÄ • Ä ^ÄÄ æ^Äæ ÄFÄ ] ~ cÄ äÄFÄÜÄ • ] ^&cÄ | ÄV@Ä æ^Ääæ cÄ } Ä^Ä • ÄÈ cÄ ÄÈ cÄ ^ÄÄ • ^ÄÄ Äæ [ äÄ ] • äÄÄæ ] äÄ } ÄÄÄ { } ] [ ä^c&cä } Ä  
**(B)** ÄV@Ä | æ^ÄÄ } | äQ ^ } Äæä Ä -SÜPÜESÜFÄ -Ä ä { } ] ] ^&æ æææ } Äæ æ • ä Ä ÄCHÄV@Ä | | æ^ÄÄ } | äQ ^ } Äæä Ä -SÜPÜESÜFÄ Ä^ä ^Äæ ÄÜÄ -SÜPÜÄ ] ~ cÄ -SÜPÜÄÜÄ -SÜFÄ ä ] ~ cÄ -SÜFÄV@Ä } | äQ ^ } cÄ -SÜPÜÄ äÄSÜFÄQæ ESÜFDæ æ&æ& ææ äÄ Ä@Äæä Ä Ä ÜÄä } æÄ Äc äÄ^ • ] ^&cÄÄ ] ~ cÄä } äÄ } ÄÄæ ÄÄ | ÄÄ ä ] ^ } ä^ cÄ | ää ^ } cÄ ^ÄÄ ] | | | ^ÄÄV@Ä } | äQ ^ } Äæä Ä äÄ IÖSÄ } äää } Ä æÄ | | { æä^Äæ ÄFÖææä Ä ää • Äv • ÄÄÄÄÄ

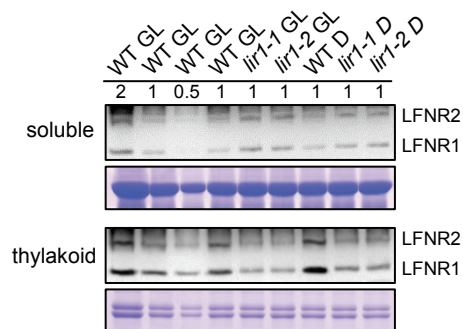

**Supplemental Figure 5.** Comparison of the Two Rice LFNR Isoforms Between WT and *lir1* Plants. Representative native-PAGE gels of soluble leaf extract and thylakoid membranes isolated from plants treated for 4 h in the dark (D) or under standard growth light (GL; 1000  $\mu\text{mol photons m}^{-2} \text{s}^{-1}$ ). Proteins were immunodetected with LFNR antibodies. The dilution series (0.5x to 2x) was made with the corresponding control (WT GL) in each gel to avoid possible saturation of the immunodetection. 1x loading = 10  $\mu\text{g}$  protein

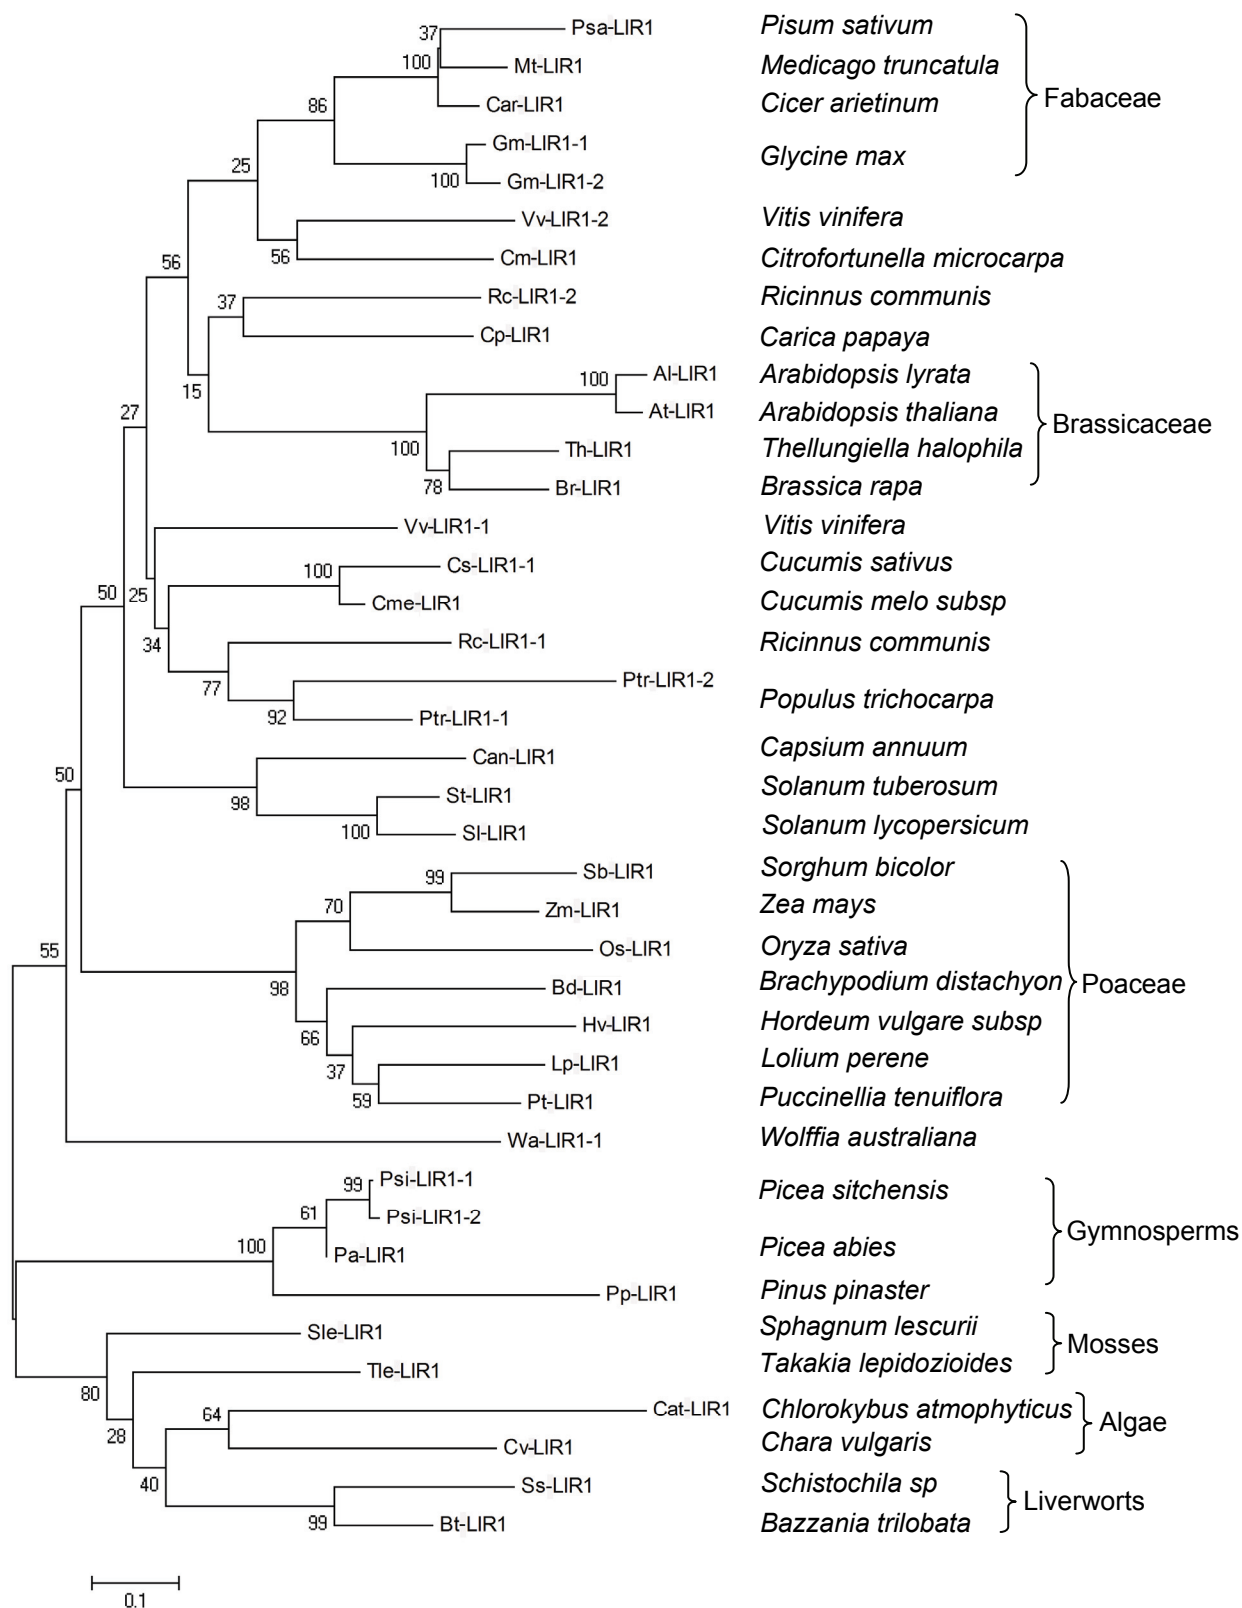

**Supplemental Figure 6.** Phylogenetic Analysis of LIR1.

The aligned LIR1 amino acid sequences from a variety of plant species were exported into MEGA 4. The phylogenetic tree was constructed using the minimal evolution method with 1000 bootstrap tests. The numbers at the nodes refer to bootstrap support percentage.

|            |                               |                    |                          |                   |                  |                  |            |
|------------|-------------------------------|--------------------|--------------------------|-------------------|------------------|------------------|------------|
| Zm-LIR1    | : QIDYS--SSVSVPPEACDILGGDA    | CNG--PMFF---       | EAKP---                  | ASAAAAASRSVVG---  | VDRYLSYDEP--     | KTVFPGEACDDLGGFC | EAPYGDGV   |
| Sb-LIR1    | : EVDYS--SSVSVPPEACDILGGDA    | CIG--KMFF---       | EAKT---                  | AAAAPEASRRVDA---  | VEREYLSYDGP--    | KTVFPGEACDDLGGFC | EAPYMDGV   |
| Os-LIR1    | : EVDYS--SNISVFPPEACDILGGDA   | CNV--QMYE---       | EAKT---                  | SSSAAVAVSRAAA---  | EDREYLSYDEP--    | TVFPPEACDDLGGFC  | CKAT----   |
| Pt-LIR1    | : EVDYS--SDVSVPPEACDILGGDA    | CAGEMYP---         | ETKP---                  | GDSAPAVAARTSP---  | EEVEREYLSYDEA--  | KTVFPGEACDDLGGFC | EAPYGTGV   |
| Lp-LIR1    | : EVDYS--SDVSVPPEACDILGGDA    | CEAAEMYP---        | ETKL---                  | SDSASAAAA--SKV--- | EEVEREYLSYDEA--  | KTVFPGEACDDLGGFC | EAPYGTGV   |
| Bd-LIR1    | : EVDYS--SSVSVPPEACDILGGDA    | CEAPEMYP---        | ETKLSAQDSSSSSSSPAVAGT--- |                   | SVVEREYLSYDDEP-- | KTVFPGEACDDLGGFC | EAPYGTGV   |
| Hv-LIR1    | : EADYS--SNVSVPPEACDILGGDA    | CQMYE---           | ETKL---                  | GGGAAAAVARA---    | PEVEREYLSYDDEP-- | KTVFPGEACDDLGGFC | EAPYGT--   |
| Wa-LIR1-1  | : TVDYS--SSTSVPPEACDILGGDA    | CANV--NVFP---      | ETKLP---                 | PANNSANANKPSS---  | EQDREYLSYDEP--   | RTVFPPEACDDLGGFC | CKPEYKRA-- |
| Ptr-LIR1-1 | : TVDYS--SFTS--VFPPEACDILGGDA | CNV--EMYP---       | EVKLPD---                | ARS--TPPS--TS---  | EQDREYLSYNSA--   | KTVFLDEACDDLGGFC | ODPGYCG--  |
| Ptr-LIR1-2 | : --KFTSGKR--HLNTEACDILGGDA   | CNV--EMYP---       | EVKLPD---                | ARN--TPRS--TS---  | EQDREYLSYNSP--   | KTVFPGEACDDLGGFC | ODPGYCG--  |
| Rc-LIR1-1  | : TVDYS--SVVS--VFPPEACDILGGDA | CNV--DMYP---       | EVKLPD---                | AES--TTAATSTAT--- | EHIREYLSYDDEP--  | KTVFLDEACDDLGGFC | ODPEYCRP-- |
| St-LIR1    | : TVDYS--SMNS--VFPPEACDILGGDA | CNV--EMYP---       | ETPKST---                | PSATASNTPTST---   | ESVIREYLSYNSP--  | KTVFLSEACDDLGGFC | EADYGTGV   |
| Sl-LIR1    | : TVDYS--SMNS--VFPPEACDILGGDA | CNV--EMYP---       | ETPKST---                | P--SSKTLMS---     | ESVIREYLSYNSP--  | KTVFLSEACDDLGGFC | EAKYGTGV   |
| Can-LIR1   | : TVDYS--SMTS--VFPPEACDILGGDA | CNV--EMYP---       | ETPKSA---                | EN--TKTQVS---     | ESVIREYLSYNSP--  | KTVFLGEACDDLGGFC | EAEYNGV    |
| Vv-LIR1-1  | : TVDYS--SMTS--VFPPEACDILGGDA | CNV--EMYP---       | EVKLPD---                | AGN--PPARS---     | EGVIREYLSYNSP--  | KTVFPGEACDDLGGFC | EPEYEGV    |
| Cs-LIR1-1  | : TVDYS--SMTS--VFPPEACDILGGDA | CNV--EMYP---       | EVKLPD---                | AKK--GNSVT---     | EPVEREYLSYNSP--  | KTVFPGEACDDLGGFC | ODPEYKGV   |
| Cme-LIR1   | : ----S--VFPPEACDILGGDA       | CNV--EMYP---       | EVKLPD---                | AKK--GSSVT---     | EPVEREYLSYNSP--  | KTVFPGEACDDLGGFC | ODPEYKGV   |
| Cm-LIR1    | : TVDYN--SAHSVFPPEACDILGGDA   | CNSA--EMYP---      | EAKLPD---                | AKN--DTST--TAS--- | EPVEREYLSYNSP--  | NVFRGEACDDLGGFC  | EREYCRGV   |
| Vv-LIR1-2  | : TVDYN--SMTS--VFPPEACDILGGDA | CLA--DCYE---       | EVRLKQE---               | ARN--RAAR--TAS--- | EVTEREYLSYNSP--  | KTVFRGEACDDLGGFC | EREYCRGV   |
| Rc-LIR1-2  | : TVDYS--SVISVFPPEACDILGGDA   | CLA--NIFP---       | EVKLEAR---               | NDA--AAR--IAS---  | EPVEREYLSYNSA--  | KTVFRGEACDDLGGFC | EREYCRGV   |
| Cp-LIR1    | : TVDYS--SAISVFPPEACDILGGDA   | CLA--DIFF---       | EVKLPD---                | EA--SSKR--IAS---  | EPFEREYLSYNSP--  | KTVFRGEACDDLGGFC | OSPDYERGA  |
| Gm-LIR1-1  | : TVDYN--SAHSVFPPEACDILGGDA   | CMA--EMYP---       | ETKLPD---                | AK--TPR--VVT---   | ENVEREYLSYNSP--  | KTVFRGEACDDLGGFC | EYKGV      |
| Gm-LIR1-2  | : TVDYN--SAHSVFPPEACDILGGDA   | CMA--EMYP---       | EVKLPD---                | AK--TPR--VVT---   | ENVEREYLSYNSP--  | KTVFRGEACDDLGGFC | EYKGV      |
| Car-LIR1   | : TVDYN--SAHSVFPPEACDILGGDA   | CLA--DMYP---       | EVKLPD---                | AKN--DTPK--AS---  | ENVEREYLSYNSP--  | KTVFRGEACDDLGGFC | EYKGV      |
| Mt-LIR1    | : TVDYN--SAHSVFPPEACDILGGDA   | CLA--DMNP---       | EVKLPD---                | ARN--DTPKTAAS---  | GNVEREYLSYNSP--  | KTVFRGEACDDLGGFC | EYKGV      |
| Psa-LIR1   | : TVDYN--SAHSVFPPEACDILGGDA   | CLA--DMYP---       | EVKLPD---                | RSN--DAPKTAAS---  | ENVIREYLSYNSP--  | KTVFRGEACDDLGGFC | EYKGV      |
| Th-LIR1    | : TVDYN--SLLSVPPEACDILGGDA    | CLA--DIYP---       | EVKLPD---                | KP--VSRPVATT---   | EPVIREYLSYNSP--  | KTVFRGEACDDLGGFC | EYKDV      |
| Br-LIR1    | : TVDYN--SLLSVPPEACDILGGDA    | CLA--DIYP---       | EVKLPD---                | KP--VSRPVAS---    | EPVIREYLSYNSP--  | KTVFRGEACDDLGGFC | EYKDV      |
| Al-LIR1    | : TVDYN--SLLSVPPEACDILGGDA    | CLA--DIYP---       | EVKLPD---                | KP--VSRPVAS---    | EPVIREYLSYNSP--  | KTVFRGEACDDLGGFC | EYKDV      |
| At-LIR1    | : TVDYN--SLLSVPPEACDILGGDA    | CLA--DIYP---       | EVKLPD---                | KP--VSRPVAS---    | EPVIREYLSYNSP--  | KTVFRGEACDDLGGFC | EYKDV      |
| Psi-LIR1-1 | : TVDYS--SASVFPPEACDILGGDA    | CNSA--EGET---      | GAETLK---                | VDSP--PTSSPGVG--- | EDREYLSYNSP--    | KTVFPGEACDDLGGFC | EYKDV      |
| Psi-LIR1-2 | : TVDYS--SASVFPPEACDILGGDA    | CNSA--EGET---      | GAETLK---                | VDSP--PTSSPGVG--- | EDREYLSYNSP--    | KTVFPGEACDDLGGFC | EYKDV      |
| Pa-LIR1    | : TVDYS--SASVFPPEACDILGGDA    | CNSA--EGET---      | GAETLK---                | VDSP--PTSSPGVG--- | EDREYLSYNSP--    | KTVFPGEACDDLGGFC | EYKDV      |
| Pp-LIR1    | : TVDYS--SASVFPPEACDILGGDA    | CNSA--EGET---      | GAETLK---                | VDSP--PTSSPGVG--- | EDREYLSYNSP--    | KTVFPGEACDDLGGFC | EYKDV      |
| Sle-LIR1   | : YVDYAG--NQSVPPEACDILGGDA    | CAEAG--VGEVRLNP--- | TTPKLASAAQK---           |                   | QPEREYLSYNSP--   | KTVFPGEACDDLGGFC | EYKDV      |
| Cat-LIR1   | : YVEYKQDSEVPPEACDILGGDA      | CAEAG--VGEVRLNP--- | TTPKLASAAQK---           |                   | DEPEREYLSYNSP--  | KTVFPGEACDDLGGFC | EYKDV      |
| Cv-LIR1    | : YVYNDP--KRTVFPPEACDILGGDA   | CAEAG--VGEVRLNP--- | TTPKLASAAQK---           |                   | EDREYLSYNSP--    | KTVFPGEACDDLGGFC | EYKDV      |
| Tle-LIR1   | : YVNTG--KQSVFPPEACDILGGDA    | CAEAG--VGEVRLNP--- | TTPKLASAAQK---           |                   | EDREYLSYNSP--    | KTVFPGEACDDLGGFC | EYKDV      |
| Ss-LIR1    | : YVDYEG--RNSVFPPEACDILGGDA   | CAEAG--VGEVRLNP--- | TTPKLASAAQK---           |                   | EDREYLSYNSP--    | KTVFPGEACDDLGGFC | EYKDV      |
| Bt-LIR1    | : YVDYEG--RNSVFPPEACDILGGDA   | CAEAG--VGEVRLNP--- | TTPKLASAAQK---           |                   | EDREYLSYNSP--    | KTVFPGEACDDLGGFC | EYKDV      |

### Supplemental Figure 7. Alignment of LIR1 Amino Acid Sequences.

Alignment of LIR1 domain amino acid sequences from the plant species shown in Supplemental Figure 6. Blue frames indicate angiosperms, orange frames gymnosperms (two isoforms of *Picea sitchensis*, *Picea abies*, *Pinus pinaster*) and green frames lower plants (moss, liverwort and green algae). The four EAC motifs are underlined in red. The red frames depict the sequences of *Brassicaceae* (*Arabidopsis thaliana*, *Arabidopsis lyrata*, *Thellungiella halophila*, *Brassica rapa*), which differ from the conserved motif. Zm denotes *Zea mays*, Sb *Sorghum bicolor*, Os *Oryza sativa*, Pt *Puccinellia tenuiflora*, Lp *Lolium perene*, Bd *Brachypodium distachyon*, Hv *Hordeum vulgare subsp*, Wa *Wolffia australiana*, Ptr *Populus trichocarpa*, Rc *Ricinus communis*, St *Solanum tuberosum*, Sl *Solanum lycopersicum*, Can *Capsium annuum*, Vv *Vitis vinifera*, Cs *Cucumis sativus*, Cme *Cucumis melo subsp*, Cm *Citrofortunella microcarpa*, Cp *Carica papaya*, Gm *Glycine max*, Car *Cicer arietinum*, Mt *Medicago truncatula*, Psa *Pisum sativum*, Th *Thellungiella halophila*, Br *Brassica rapa*, Al *Arabidopsis lyrata*, At *Arabidopsis thaliana*, Psi *Picea sitchensis*, Pa *Picea abies*, Pp *Pinus pinaster*, Sle *Sphagnum lescurii*, Cat *Chlorokybus atmophyticus*, Cv *Chara vulgaris*, Tle *Takakia lepidozioides*, Ss *Schistochila sp*, and Bt *Bazzania trilobata*.

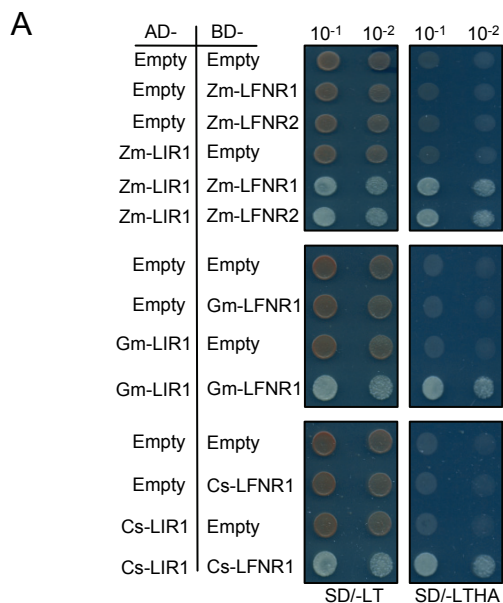

**Supplemental Figure 8.** Interaction between LIR1 and LFNR from Maize, Soybean, and Cucumber. Yeast two-hybrid analysis of interactions between LIR1 and LFNR proteins from *Zea mays*, *Glycine max*, and *Cucumis sativus*. Yeast lines harboring either the empty control plasmids (AD; activation domain, BD; bait domain) or plasmids containing the fusion constructs (AD-)Zm-/Gm-/Cs-LIR1 or (BD-)Zm-/Gm-/Cs-LFNR1/2 were grown on synthetic medium supplied with dextrose (SD) in the absence of Trp and Leu (SD/-LT, left panels) and on SD medium in the absence of Trp, Leu, His, and Ade (SD/-LTHA, right panels). Yeast cells were incubated until OD<sub>600</sub>=1, diluted 10 and 100-fold, and grown on culture medium for 3 d.



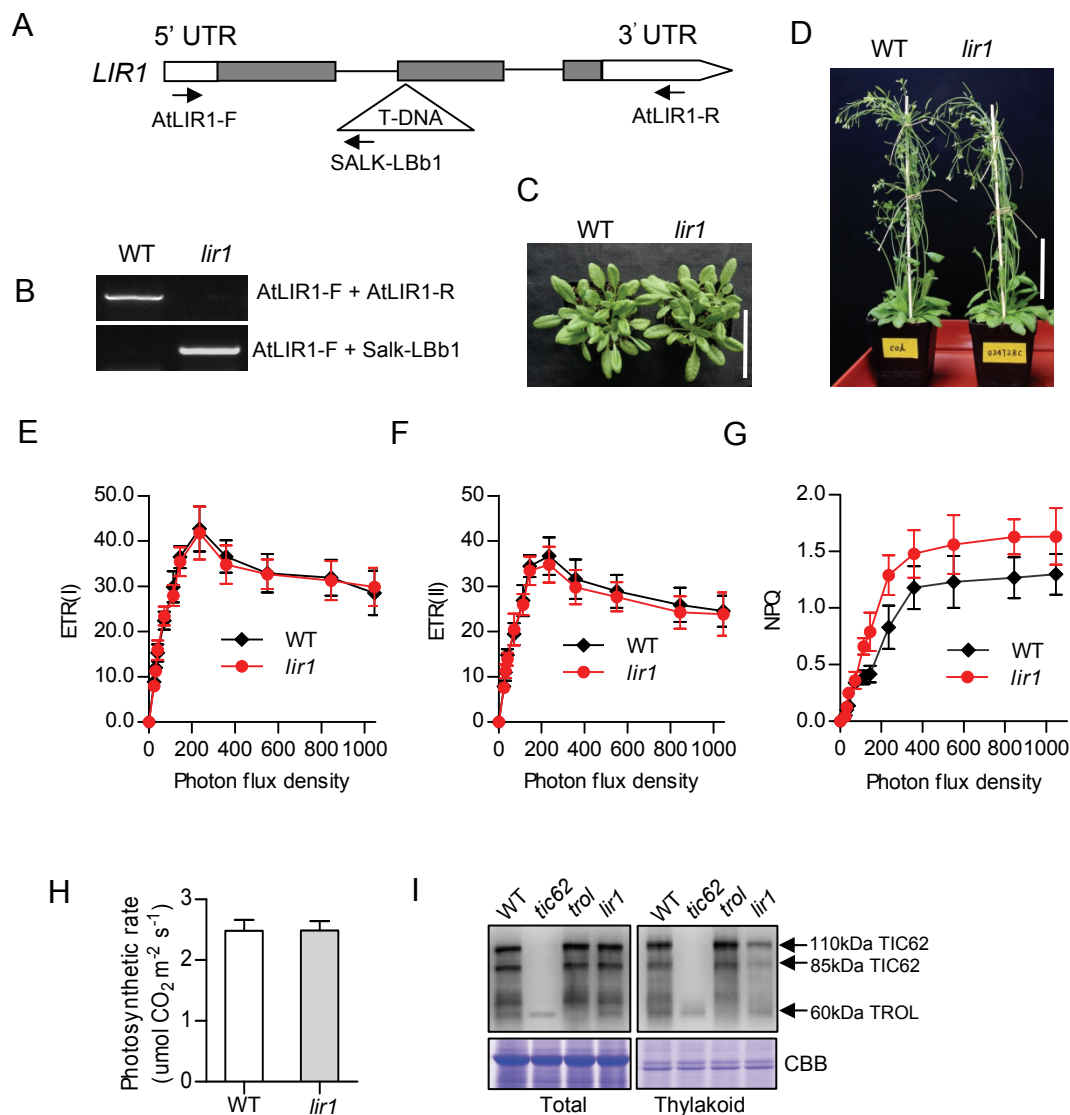**Supplemental Figure 9.** Characteristics of Arabidopsis *lir1* Plants.

**(A)** Genomic structure of Arabidopsis *LIR1*. Gray boxes denote exons, black lines introns, and white boxes 5'- and 3'-untranslated regions. The insertion site of SALK\_024728c (*lir1*) is indicated by a triangle. The binding sites for *LIR1* gene-specific primers (AtLIR1-F, AtLIR1-R) and T-DNA-specific left border (Salk-LBb1) used to screen *lir1* homozygous plants are depicted.

**(B)** PCR analysis of WT and *lir1* using genomic DNA as PCR template with the primers indicated in (A).

**(C)** and **(D)** Phenotypes of WT and *lir1* plants in the vegetative growth (C) and reproductive growth (D) stages. Bars = 10 cm.

**(E)** and **(F)** Electron transfer rate (ETR) of PSI (E) and PSII (F) of WT and *lir1* plants under different actinic light intensities. Bars represent means  $\pm$  s.d.

**(G)** Nonphotochemical quenching (NPQ) of WT and *lir1* plants under different actinic light intensities. Bars represent means  $\pm$  s.d.

**(H)** Photosynthetic rates of WT and *lir1* plants at 150  $\mu\text{mol photons m}^{-2} \text{s}^{-1}$ .

**(I)** Immunoblot analysis of WT, *tic62*, *trol*, and *lir1* plants; 10  $\mu\text{g}$  total leaf extract or thylakoid proteins was loaded onto the SDS gel and immunolabeled with TIC62 antibody. Coomassie Brilliant Blue (CBB) staining was used to verify equal loading of the gel.

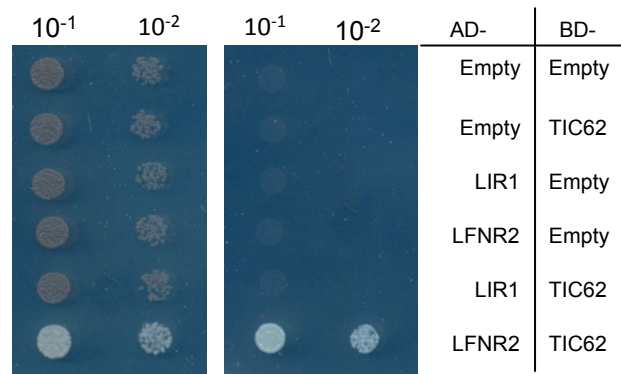

**Supplemental Figure 10.** Interaction Test between Rice LIR1 and TIC62 by Yeast Two-Hybrid Assay. Yeast lines harboring either the empty control plasmids (AD; activation domain, BD; bait domain) or plasmids containing the fusion proteins (AD-LIR1, AD-LFNR2 or BD-TIC62) were grown on synthetic medium supplemented with dextrose (SD) in the absence of Trp and Leu (SD/-LT, left panels) and on SD medium in the absence of Trp, Leu, His, and Ade (SD/-LTHA, right panels). Yeast cells were incubated until  $OD_{600} = 1$ , diluted 10 and 100-fold, and grown on culture medium for 3 d. The interaction test between LFNR2 and TIC62 was used as a positive control.

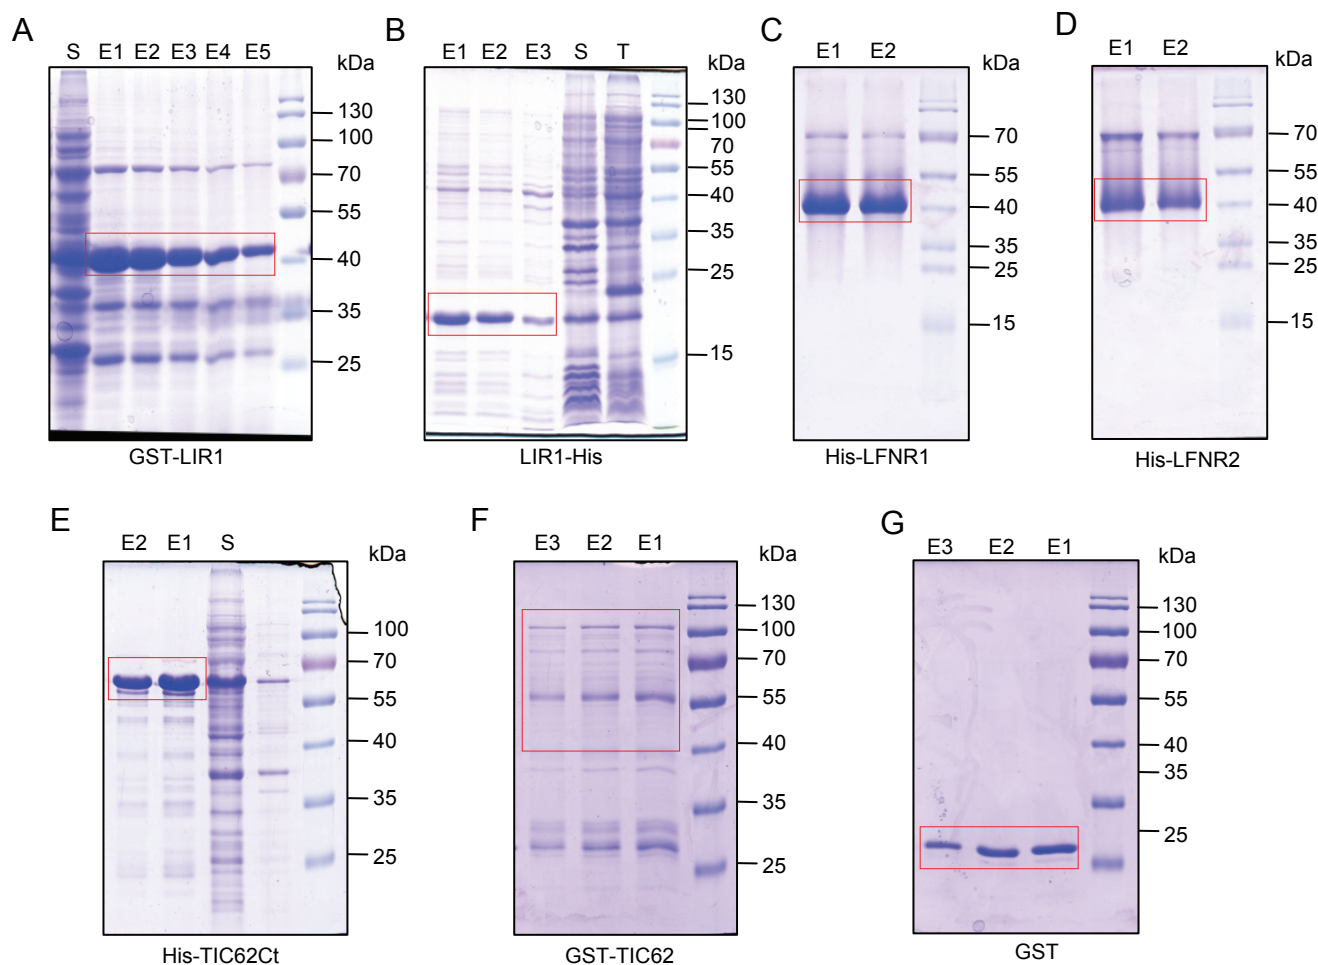

**Supplemental Figure 11.** The CBB-Stained Gels of All Purified Proteins from *Escherichia coli* Used in this Research. (A) to (G) CBB staining of purified GST-LIR1 (A), LIR1-His (B), His-LFNR1 (C), His-LFNR2 (D), His-TIC62Ct (E), GST-TIC62 (F) and GST (G) from *E. coli*. The red rectangle indicates the relevant purified proteins. After elution, 3  $\mu$ L purified proteins were loaded in each well. S denotes the supernatant after ultrasonication of bacteria, T denotes the total proteins of bacteria, and E1 to E5 denote proteins of the first, second, third, fourth or fifth elution, respectively.

**Supplemental Table 1.** List of LC-MS identified unique peptide fragments in the 35 kDa band from coimmunoprecipitation.

| Protein    | UPC | Cover % | Peptide Sequence              | MH+      | XC     | $\Delta$ Cn | Ions  |
|------------|-----|---------|-------------------------------|----------|--------|-------------|-------|
| LFNR2      | 14  | 45.58   | K.DGIDWADYK.K                 | 1083.132 | 2.7849 | 0.3096      | 14 16 |
| Os06g01850 |     | %       | K.DGIDWADYK.K                 | 1211.305 | 2.489  | 0.3468      | 15 18 |
|            |     |         | K.DNTYVVMCGLK.G               | 1364.543 | 2.8134 | 0.2746      | 17 20 |
|            |     |         | K.DPNANIIMLATGTGIAPFR.S       | 1973.286 | 4.5745 | 0.5426      | 24 36 |
|            |     |         | K.EMLMPK.D                    | 748.9782 | 2.0418 | 0.1154      | 8 10  |
|            |     |         | K.GIDDIMVSLAAK.D              | 1233.46  | 3.8084 | 0.4442      | 18 22 |
|            |     |         | K.GVCSNFLCDLKPQSDVK.I         | 1897.106 | 2.4579 | 0.3749      | 15 32 |
|            |     |         | K.HDEGVVTNK.Y                 | 999.0601 | 2.5856 | 0.5069      | 13 16 |
|            |     |         | K.ITADDAPGETWHMVFSTEGEIPYR.E  | 2723.955 | 3.8867 | 0.5037      | 30 92 |
|            |     |         | K.KHDEGVVTNK.Y                | 1127.233 | 2.557  | 0.2475      | 13 18 |
|            |     |         | K.RLVYTNDQGEIVK.G             | 1535.727 | 2.9613 | 0.2067      | 16 24 |
|            |     |         | R.EGQSIGVIADGVDK.N            | 1388.506 | 3.1348 | 0.4238      | 18 26 |
|            |     |         | R.LVYTNDQGEIVK.G              | 1379.584 | 2.9499 | 0.1002      | 15 22 |
|            |     |         | R.MAEYKEELWELLK.K             | 1682.962 | 3.3502 | 0.3737      | 18 24 |
| LFNR1      | 15  | 50.00   | K.DGIDWLDYK.K                 | 1253.385 | 2.4642 | 0.4864      | 14 18 |
| Os02g01340 |     | %       | K.DNTYVVMCGLK.G               | 1364.543 | 2.8134 | 0.2746      | 17 20 |
|            |     |         | K.DPNATIIMLGTTGTGIAPFR.S      | 1946.26  | 4.4318 | 0.3195      | 22 36 |
|            |     |         | K.EMLMPK.D                    | 748.9782 | 2.0418 | 0.1154      | 8 10  |
|            |     |         | K.GIDDIMIDLAAK.D              | 1275.497 | 3.6524 | 0.3802      | 18 22 |
|            |     |         | K.GVCSNFLCDLKPQSDVK.I         | 1897.106 | 2.4579 | 0.3749      | 15 32 |
|            |     |         | K.KQVDGVVTNK.Y                | 1088.24  | 2.5345 | 0.3719      | 13 18 |
|            |     |         | K.RLVYTNDQGEIVK.G             | 1535.727 | 2.9613 | 0.2067      | 16 24 |
|            |     |         | R.EGQSIGVIPDGIDK.N            | 1428.57  | 2.7549 | 0.137       | 16 26 |
|            |     |         | R.FRLDFAVSR.E                 | 1111.278 | 3.0978 | 0.2028      | 13 16 |
|            |     |         | R.ITGDDAPGETWHMVFSTDEGEIPYR.E | 2695.901 | 3.1482 | 0.2326      | 22 46 |
|            |     |         | R.LVYTNDQGEIVK.G              | 1379.584 | 2.9499 | 0.1002      | 15 22 |
|            |     |         | R.LYSIASSAIGDFADSK.T          | 1645.792 | 3.1821 | 0.5452      | 19 30 |
|            |     |         | R.MAEYKDELWELLK.D             | 1797.108 | 4.1151 | 0.3621      | 29 52 |
|            |     |         | R.MKEIAPER.F                  | 974.1603 | 2.459  | 0.2446      | 13 14 |

**Supplemental Table 2.** List of LC-MS identified unique peptide fragments in the 25 kDa band from coimmunoprecipitation.

| Protein    | UPC | Cover % | Peptide Sequence             | MH+      | XC     | $\Delta$ Cn | Ions   |
|------------|-----|---------|------------------------------|----------|--------|-------------|--------|
| LIR1       | 5   | 41.41   | K.LSSSAAVAVSR.A              | 1048.176 | 1.9954 | 0.3605      | 10 20  |
| Os01g01340 |     | %       | R.AAAEEVDR.D                 | 860.8923 | 1.9482 | 0.2318      | 8 14   |
|            |     |         | R.AAAEEVDRDYLSYDEPTTVFPPEEAC | 3901.05  | 4.2106 | 0.5681      | 33 132 |
|            |     |         | R.DYLSYDEPTTVFPPEEACDDLGGFC  | 3059.18  | 3.0163 | 0.4019      | 19 50  |
|            |     |         | R.SLQIQAPR.R                 | 913.0567 | 2.0658 | 0.2043      | 11 14  |

UPC: (Unique peptide count) the count of unique peptide sequences associated with specific protein. Cover %: protein's sequence coverage. The fields enumerated for each unique peptide include sequence, MH+ (the molecular weight of the peptides), XC (Xcorr, the cross-correlation value),  $\Delta$ Cn (the change in cross-correlation), Ions (the ion value = dividing the number of matched ions by the total number of ions).

**Supplemental Table 3. Primers used in this research.**

| Purpose                                 | Primer name          | Primer sequence                        |
|-----------------------------------------|----------------------|----------------------------------------|
| Os-LIR1 CRISPR                          | OsLIR1-CRISPR-F      | GTGTGGGGCGCAGCCTGCAGATTC               |
|                                         | OsLIR1-CRISPR-R      | AAACGAATCTGCAGGCTGCGCCCC               |
| <i>P<sub>Os-LIR1</sub></i> :Os-LIR1-GFP | pOsLIR1-EcoR I-F     | CGGAATTCTCAGCATGGAGCCCAACCTCCCGTC      |
|                                         | pOsLIR1-Kpn I-R      | GGGGTACCCTTCTTCTTCTTCTTCTTCTTCTTCTT    |
|                                         | OsLIR1-Kpn I-F       | GGGGTACCATGCAGACCGCTGCTAGCAGTG         |
|                                         | OsLIR1-Xba I-R       | GCTCTAGAGGTGGCCTTGCAGAACTCT            |
| qRT-PCR                                 | OsACTIN-qRT-F        | CAACACCCCTGCTATGTACG                   |
|                                         | OsACTIN-qRT-R        | CATCACCAGAGTCCAACACAA                  |
| qRT-PCR                                 | OsLIR1-qRT-F         | CTGCGGAGGTGGACTACAG                    |
|                                         | OsLIR1-qRT-R         | AGAGCTTGGCCTCTGGGTA                    |
| qRT-PCR                                 | GFP-qRT-F            | TATATCATGGCCGACAAGCA                   |
|                                         | GFP-qRT-R            | GATGTTGTGGCGGATCTTG                    |
| qRT-PCR                                 | Flag-qRT-F           | AGCTTATCGATACCGTCGAG                   |
| GST-Os-LIR1                             | OsLIR1-EcoR I-F      | CGGAATTCATGCAGACCGCTGCTAGCAGTG         |
|                                         | OsLIR1-Xho I-R       | CCGCTCGAGTCAGGTGGCCTTGCAGAACTCT        |
| 35S:Flag-Os-LIR1                        | OsLIR1-Kpn I-F       | GGGGTACCATGCAGACCGCTGCTAGCAGTG         |
|                                         | OsLIR1-Sac I-R       | AAAGAGCTCTCAGGTGGCCTTGCAGAACTCT        |
| 35S:Os-LFNR1-MYC                        | OsLFNR1-Kpn I-F      | GAAGGTACCATGGCCGCCGTACGGCTGCGGCCGTC    |
|                                         | OsLFNR1-MYC-BamH I-R | CGCGGATCCCCTAGACTTCCACATTCCATTGC       |
| 35S:Os-LFNR2-MYC                        | OsLFNR2-Kpn I-F      | GAAGGTACCATGGCCGCCGTGAACACAGTGTCG      |
|                                         | OsLFNR2-MYC-BamH I-R | CGCGGATCCCCTAGACTTCCACGTTCCATTGC       |
| Os- <i>tic62</i> T-DNA test             | LB2                  | CGCTCATGTGTTGAGCATAT                   |
|                                         | OsTIC62-F1           | ATGGAGCAAGCAGCGAAGGCCA                 |
|                                         | OsTIC62-R1           | CTATAGTTTGGGGGTAGATGGG                 |
|                                         | OsTIC62-R2           | GACTAAATTACTTCTTATACAT                 |
| His-Os-TIC62Ct                          | OsTIC62-EcoR I -F    | CCGGAATCCCTCCGCCCGAACCTGAGGTAGTT       |
|                                         | OsTIC62-Not I -R     | ATAAGAATGCGGCCGCCTATAGTTTGGGGGTAGATGGG |
| GST-Os-TIC62                            | OsTIC62-EcoR I -F    | CCGGAATTCATGGAGCAAGCAGCGAAGGCCA        |
|                                         | OsTIC62-Not I -R     | ATAAGAATGCGGCCGCCTATAGTTTGGGGGTAGATGGG |
| Os-LIR1-His                             | OsLIR1-Nde1-F        | GGAATTCATATGCAGACCGCTGCTAGCAGTG        |
|                                         | OsLIR1-Xho1-R noTGA  | CCGCTCGAGGGTGGCCTTGCAGAACTCTCCG        |
| His-Os-LFNR1                            | OsLFNR1-Nde1-F       | GGAATTCATATGATGGCCGCCGTGAACACAGTGT     |
|                                         | OsLFNR1-Xho1-R       | CCGCTCGAGTCAGTAGACTTCCACATTCCAT        |
| His-Os-LFNR2                            | OsLFNR2-Nde1-F       | GGAATTCATATGATGGCCGCCGTGACGGCTGCGG     |
|                                         | OsLFNR2-Xho1-R       | CCGCTCGAGTTAGTAGACTTCCACGTTCCAT        |
| Os-LIR1 pGADT7                          | OsLIR1-EcoR I-F      | CGGAATTCATGCAGACCGCTGCTAGCAGTG         |
|                                         | OsLIR1-Xho I-R       | CCGCTCGAGTCAGGTGGCCTTGCAGAACTCT        |
| Os-LFNR1 pGBKT7                         | OsLFNR1-EcoR I-F     | CGGAATTCATGGCCGCCGTGACGGCTGCGGCCGTC    |
|                                         | OsLFNR1-BamH I-R     | CGCGGATCCTCAGTAGACTTCCACATTCCATTGC     |
| Os-LFNR2 pGBKT7                         | OsLFNR2-Kpn I-F      | GAAGGTACCATGGCCGCCGTGAACACAGTGTCG      |

|                            |                      |                                                 |
|----------------------------|----------------------|-------------------------------------------------|
|                            | OsLFNR2-MYC-BamH I-R | CGCGGATCCTTAGTAGACTTCCACGTTCCATTGC              |
| Os-TIC62 pGBKT7            | OsTIC62-Sfi I-F      | GCAGGCCATGGAGGCCATGGAGCAAGCAGCGAAGGCCA          |
|                            | OsTIC62-Sfi I-R      | GCAGGCCTCCATGGCCCTATAGTTTGGGGGTAGATGGG          |
| Zm-LIR1 pGADT7             | ZmLIR1-EcoR I-F      | CCGGAATTCATGCAGGCTGCCGCTACTGCCGC                |
|                            | ZmLIR1-Xho I-R       | CCGCTCGAGTCAGGCGTGCCAGCTCCTTGGAG                |
| Zm-LFNR1 pGBKT7            | ZmLFNR1-EcoR I-F     | CCGGAATTCATGGCTGCCGTGACCGCGGCGG                 |
|                            | ZmLFNR1-BamH I-R     | CGCGGATCCTCAGTAGACTTCGACGTTCCATTGC              |
| Zm-LFNR2 pGBKT7            | ZmLFNR2-EcoR I-F     | CCGGAATTCATGGCCACCGTCATGGCCGCG                  |
|                            | ZmLFNR2-BamH I-R     | CGCGGATCCTTAGTAGACCTCCACATTCCATTGA              |
| Gm-LIR1 pGADT7             | GmLIR1-EcoR I-F      | CCGGAATTCATGCAAACATCCTTAACCTTTGCTG              |
|                            | GmLIR1-Xho I-R       | CCGCTCGAGCTAGTAGACACCCCTTCTGATACTCG             |
| Gm-LFNR1-pGBKT7            | GmLFNR1-EcoR I-F     | CCGGAATTCATGGCTGCTGCGGTTAGTGCTGC                |
|                            | GmLFNR1-BamH I-R     | CGCGGATCCTTAATAGACTTCGACATTCATTGC               |
| Gm-LFNR2 pGBKT7            | GmLFNR2-EcoR I-F     | CCGGAATTCATGGCTGCTGCGGTTAGTGCTG                 |
|                            | GmLFNR2-BamH I-R     | CGCGGATCCTTAATAGACTTCGACATTCATTGC               |
| Cs-LIR1 pGADT7             | CsLIR1-BamH I-F      | CGGGATCCATGCAGTTCCAGGCAGCTCTTTCCA               |
|                            | CsLIR1-Xho I-R       | CCGCTCGAGCTAGTAACTCCTTTTTGATACTCT               |
| Cs-LFNR1 pGBKT7            | CsLFNR1-EcoR I-F     | CGGAATTCATGGCCGCCCGCGTAACCGCCGCGG               |
|                            | CsLFNR1-Bam H I-R    | CGGGATCCTCAATAAACTTCCACATTCCATTGC               |
| Os- <i>lir1-1</i> test     | OsLIR1-dCAPS-F       | GGCCGTGTTGCCCGCTGCTGTGAAGGGGCGCAGCCTGCG<br>AATT |
|                            | OsLIR1-dCAPS-R       | TGTTAGAGCTGTAGTCCACCTCCGACGCTCC                 |
| At- <i>lir1</i> T-DNA test | AtLIR1-F             | TCACTAAACCTATCTTCTTAACCA                        |
|                            | AtLIR1-R             | CTTAATCTTGTGTAACCCCA                            |
|                            | Salk-LBb1            | GCGTGGACCGCTTGTGCAACT                           |
| BiFC for Os-LIR1           | OsLIR1-Pac I-F       | CCCTTAATTAATATGCAGACCGCTGCTAGCAGTG              |
|                            | OsLIR1-Asc I-R       | TTGGCGCGCCCGGTGGCCTTGCAACTCTCCG                 |
| BiFC for Os-LFNR1          | OsLFNR1-Pac I-F      | CCCTTAATTAACATGGCCGCCGTGACGGCTGCCG              |
|                            | OsLFNR1-Asc I-R      | TTGGCGCGCCCGTAGACTTCCACGTTCCATTGCTCG            |
| BiFC for Os-LFNR2          | OsLFNR2-Pac I-F      | CCCTTAATTAACATGGCCGCCGTGAACACAGTGT              |
|                            | OsLFNR2-Asc I-R      | TTGGCGCGCCCGTAGACTTCCACATTCCATTGCTCC            |
| BiFC for Os-RBCs           | OsRBCs-Pac I-F       | CCCTTAATTAACATGGCTCCCTCGGTGATGGCTTCGT           |
|                            | OsRBCs-Asc I-R       | AAAGGCGCGCCCTTAGTTGCCGCTGACTCCTCGCAA            |

### **Supplemental Methods. Phylogenetic Analysis.**

The protein sequences of LIR1 from 37 plant species were aligned with MUSCLE tools (Edgar, 2004) from EBI webserver (<http://www.ebi.ac.uk/Tools/msa/muscle/>). The resulting alignment was used for phylogenetic analysis. The topology was inferred using minimal evolution (ME) as implemented in MEGA version 4 (Tamura et al., 2007) using a Jones-Taylor-Thornton (JTT) substitution model with 1000 bootstrap replicates, uniform rates among sites and gaps with pairwise deletion. The initial tree was obtained by Neighbor joining (NJ) method and we used close-neighbor-interchange search to examine the neighborhood of the NJ tree to find the potential ME tree. The numbers at the nodes refer to bootstrap support percentage.

### **Supplemental References.**

**Edgar R.C.** (2004). MUSCLE: a multiple sequence alignment method with reduced time and space complexity. *BMC Bioinforma.* 5:113. doi: 10.1186/1471-2105-5-113.

**Tamura K., Dudley J., Nei M., and Kumar S.** (2007). MEGA4: Molecular Evolutionary Genetics Analysis (MEGA) Software Version 4.0. *Mol. Biol. Evol.* 24 (8): 1596-1599.
